# Supplementary material for: DNA Double-Strand Break Resection Occurs during Non-homologous End Joining in G1 but Is Distinct from Resection during Homologous Recombination
Source: PubMed Central journal article supplement (PMC5316416; doi:10.1016/j.molcel.2016.12.016), 2017-02-16
Supplement: mmc1.pdf [file mmc1.pdf]

**Molecular Cell, Volume 65**

**Supplemental Information**

**DNA Double-Strand Break Resection Occurs during  
Non-homologous End Joining in G1 but Is Distinct  
from Resection during Homologous Recombination**

**Ronja Biehs, Monika Steinlage, Olivia Barton, Szilvia Juhász, Julia Künzel, Julian Spies, Atsushi Shibata, Penny A. Jeggo, and Markus Löbrich**

# Figure S1

**A**

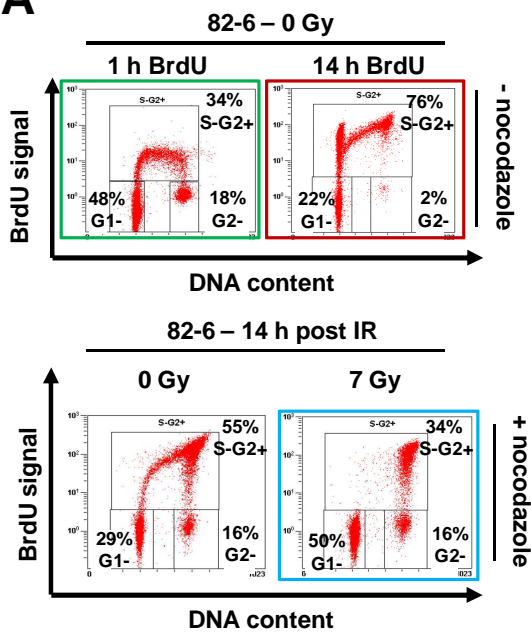

**B**

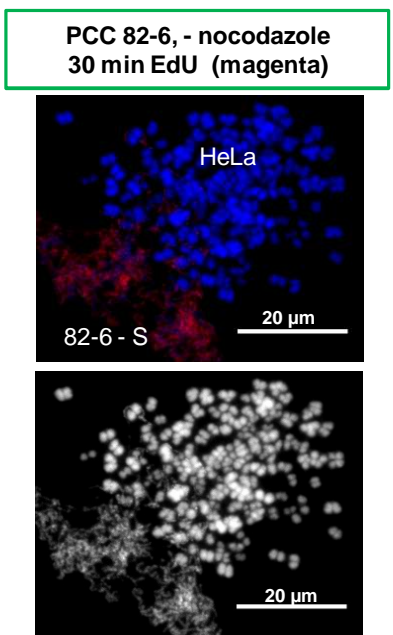

**C**

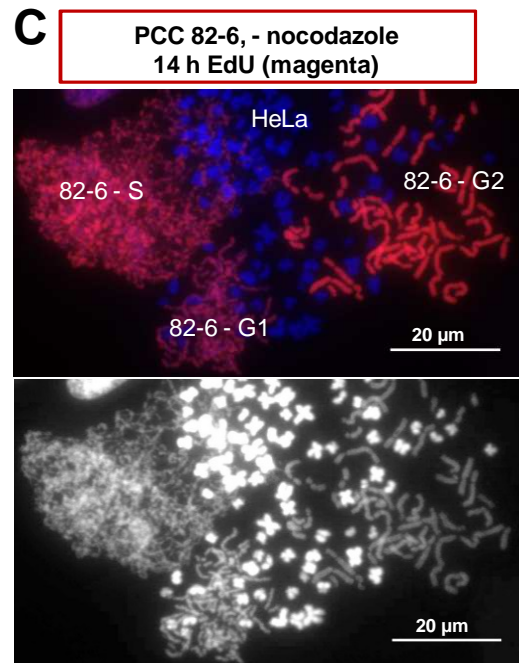

**D**

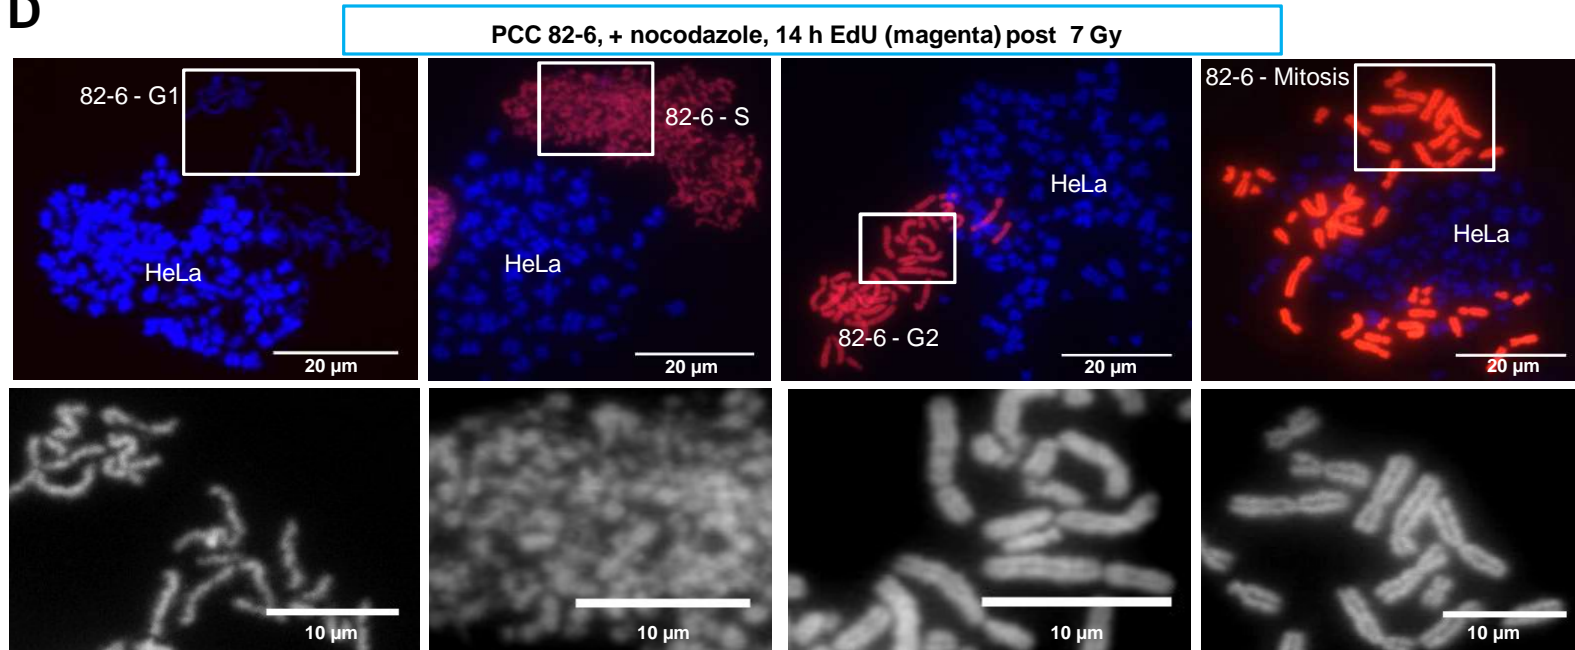

**E**

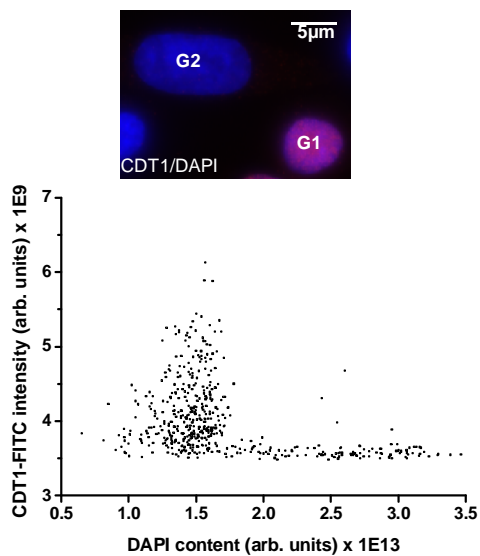

**F**

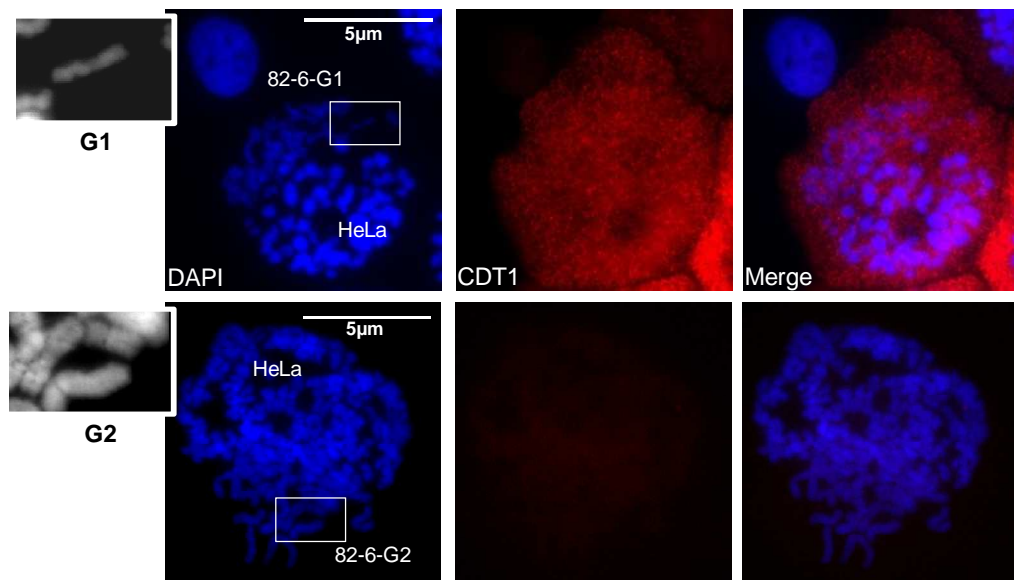

# Figure S2

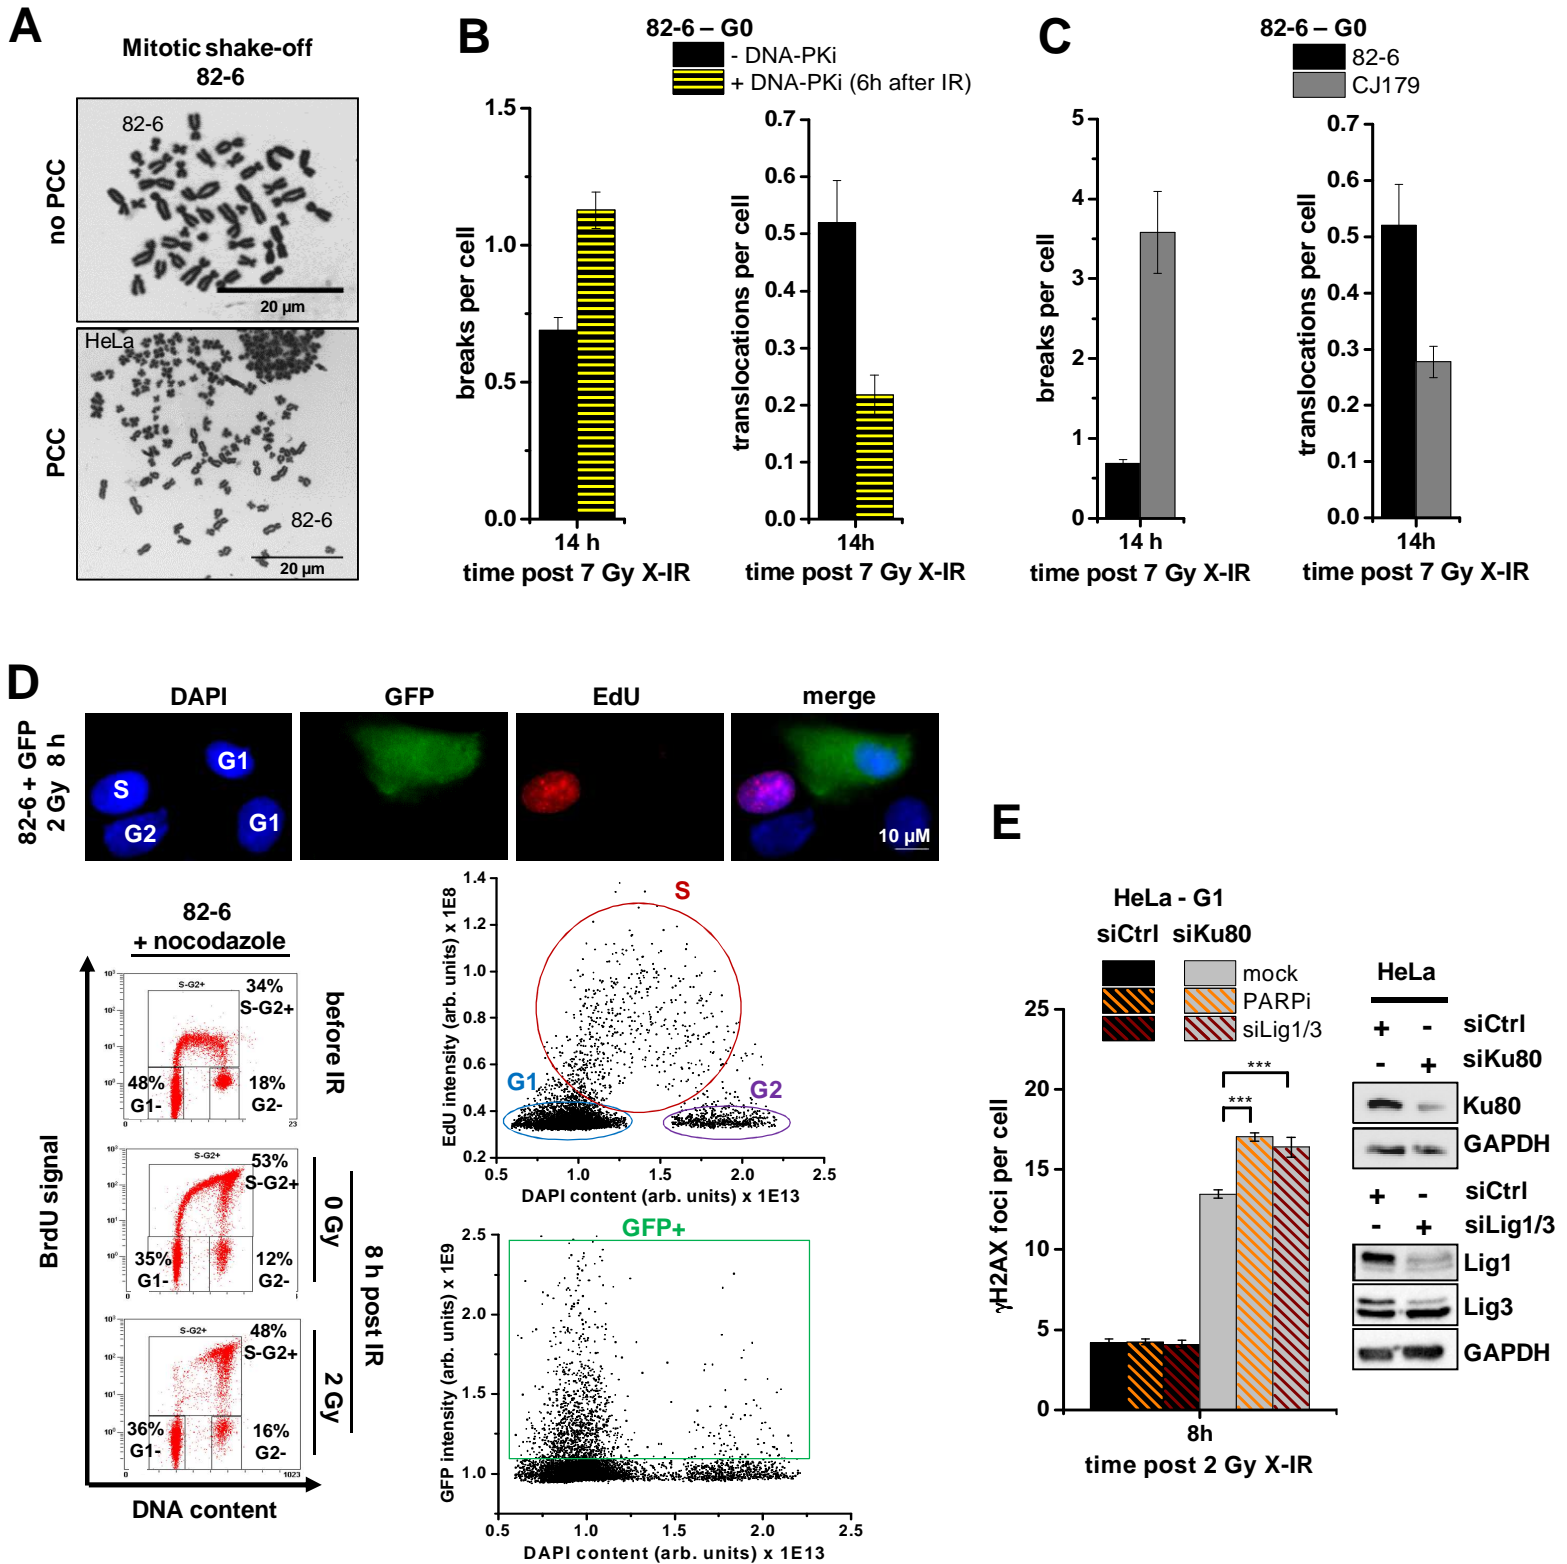

# Figure S3

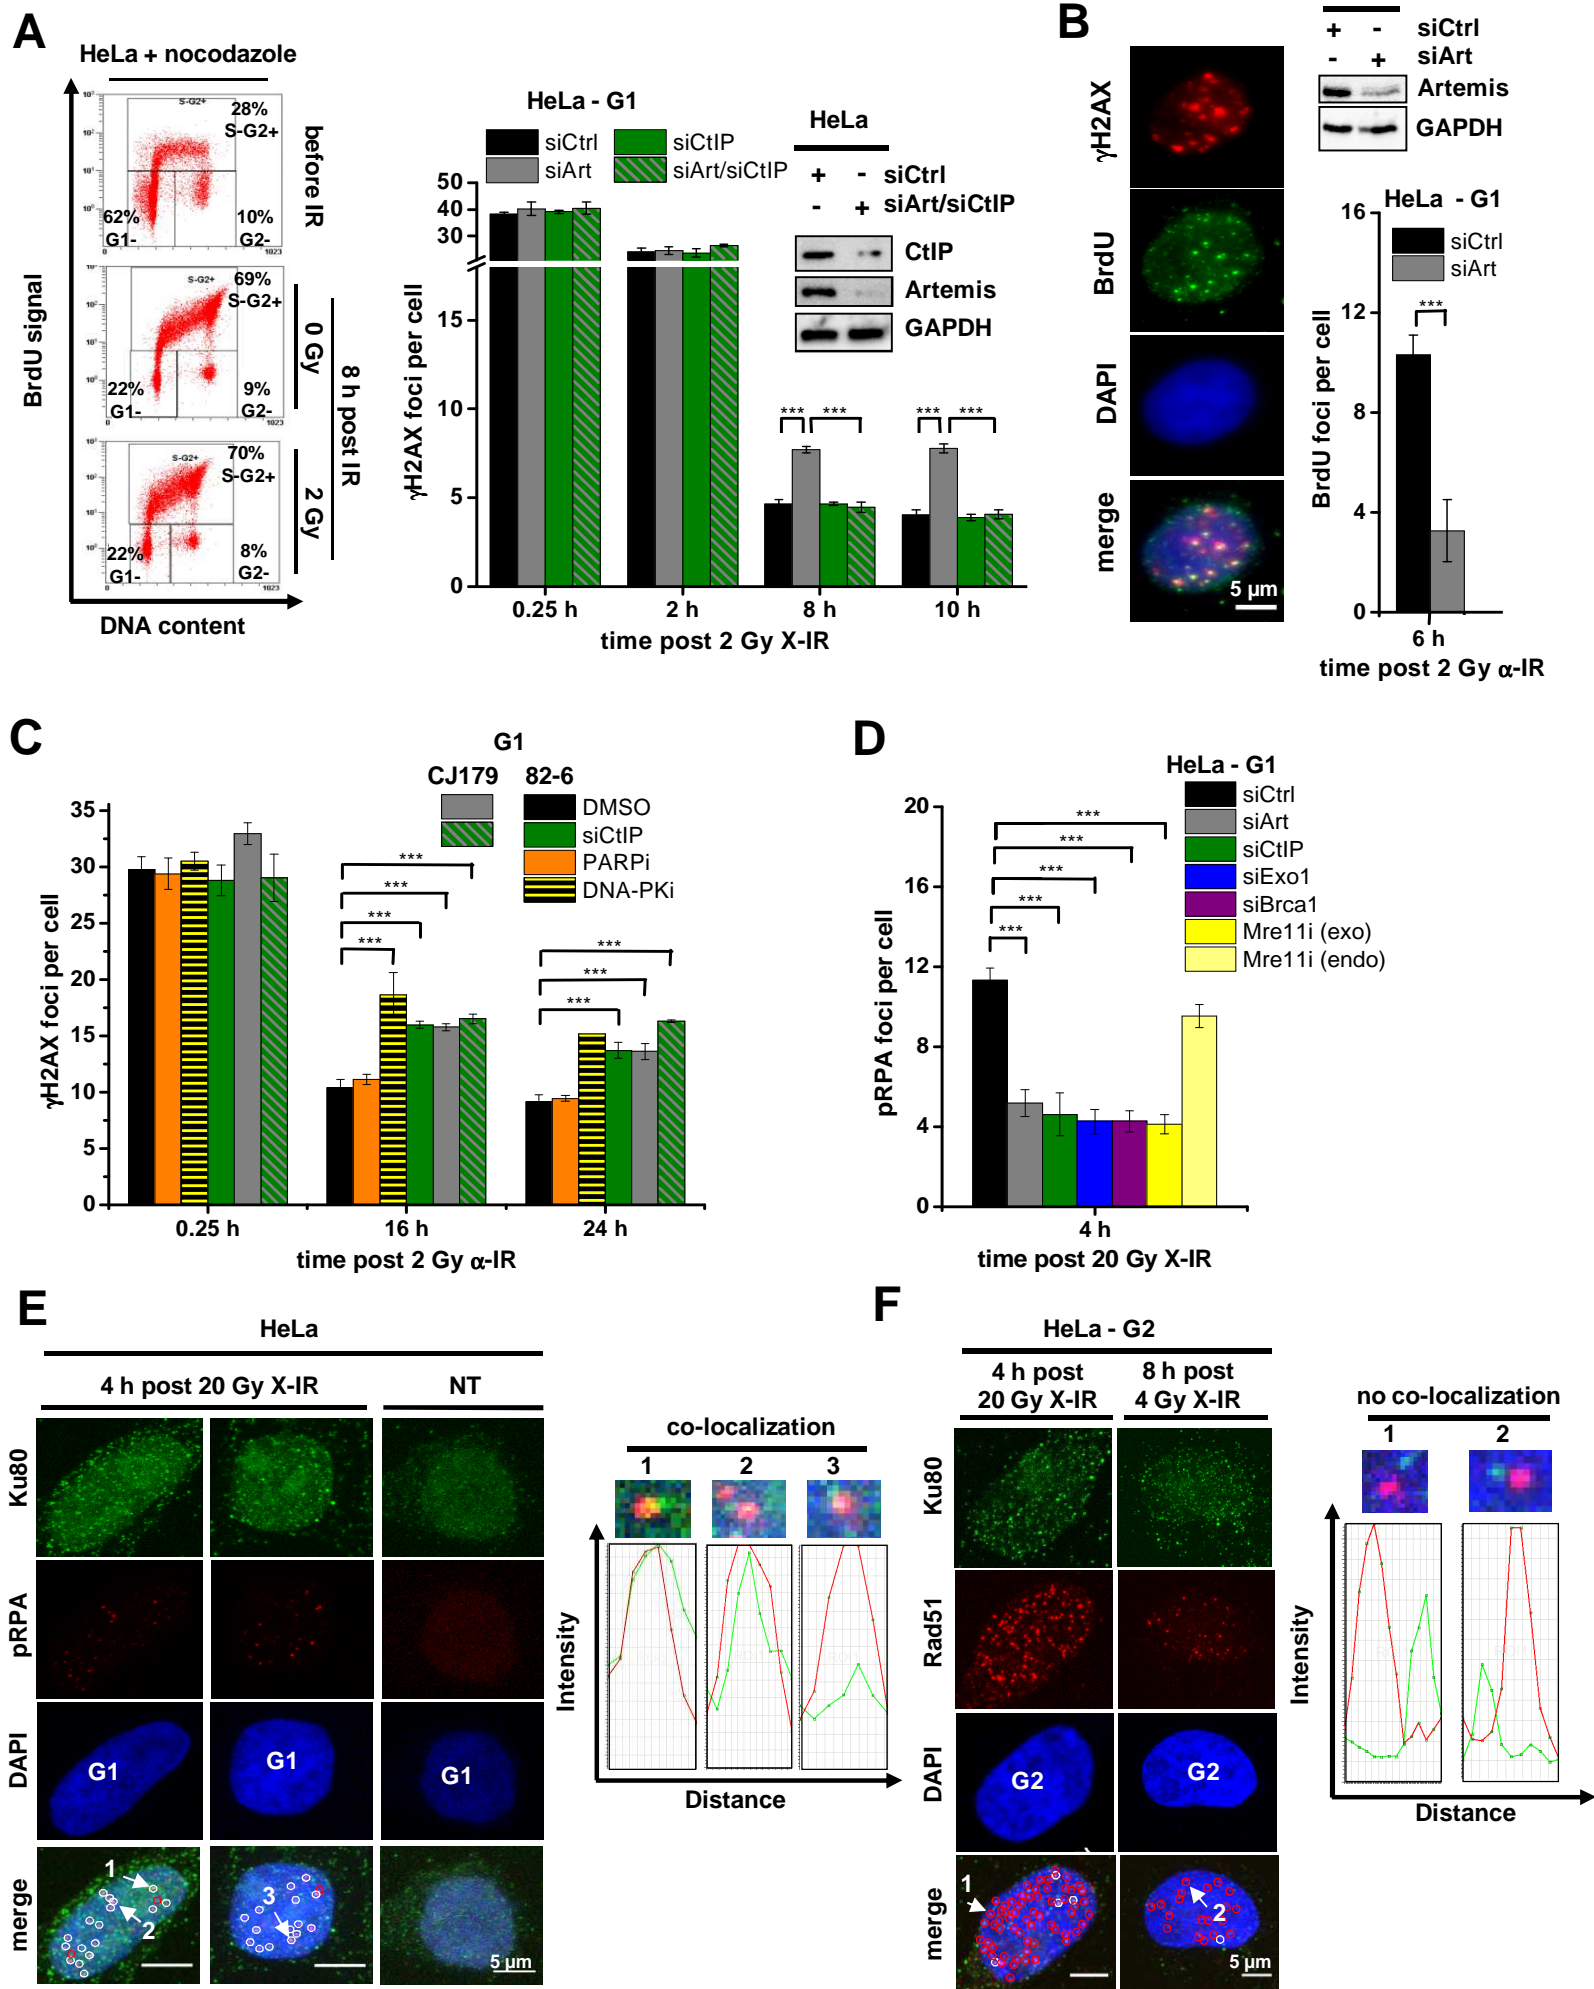

# Figure S4

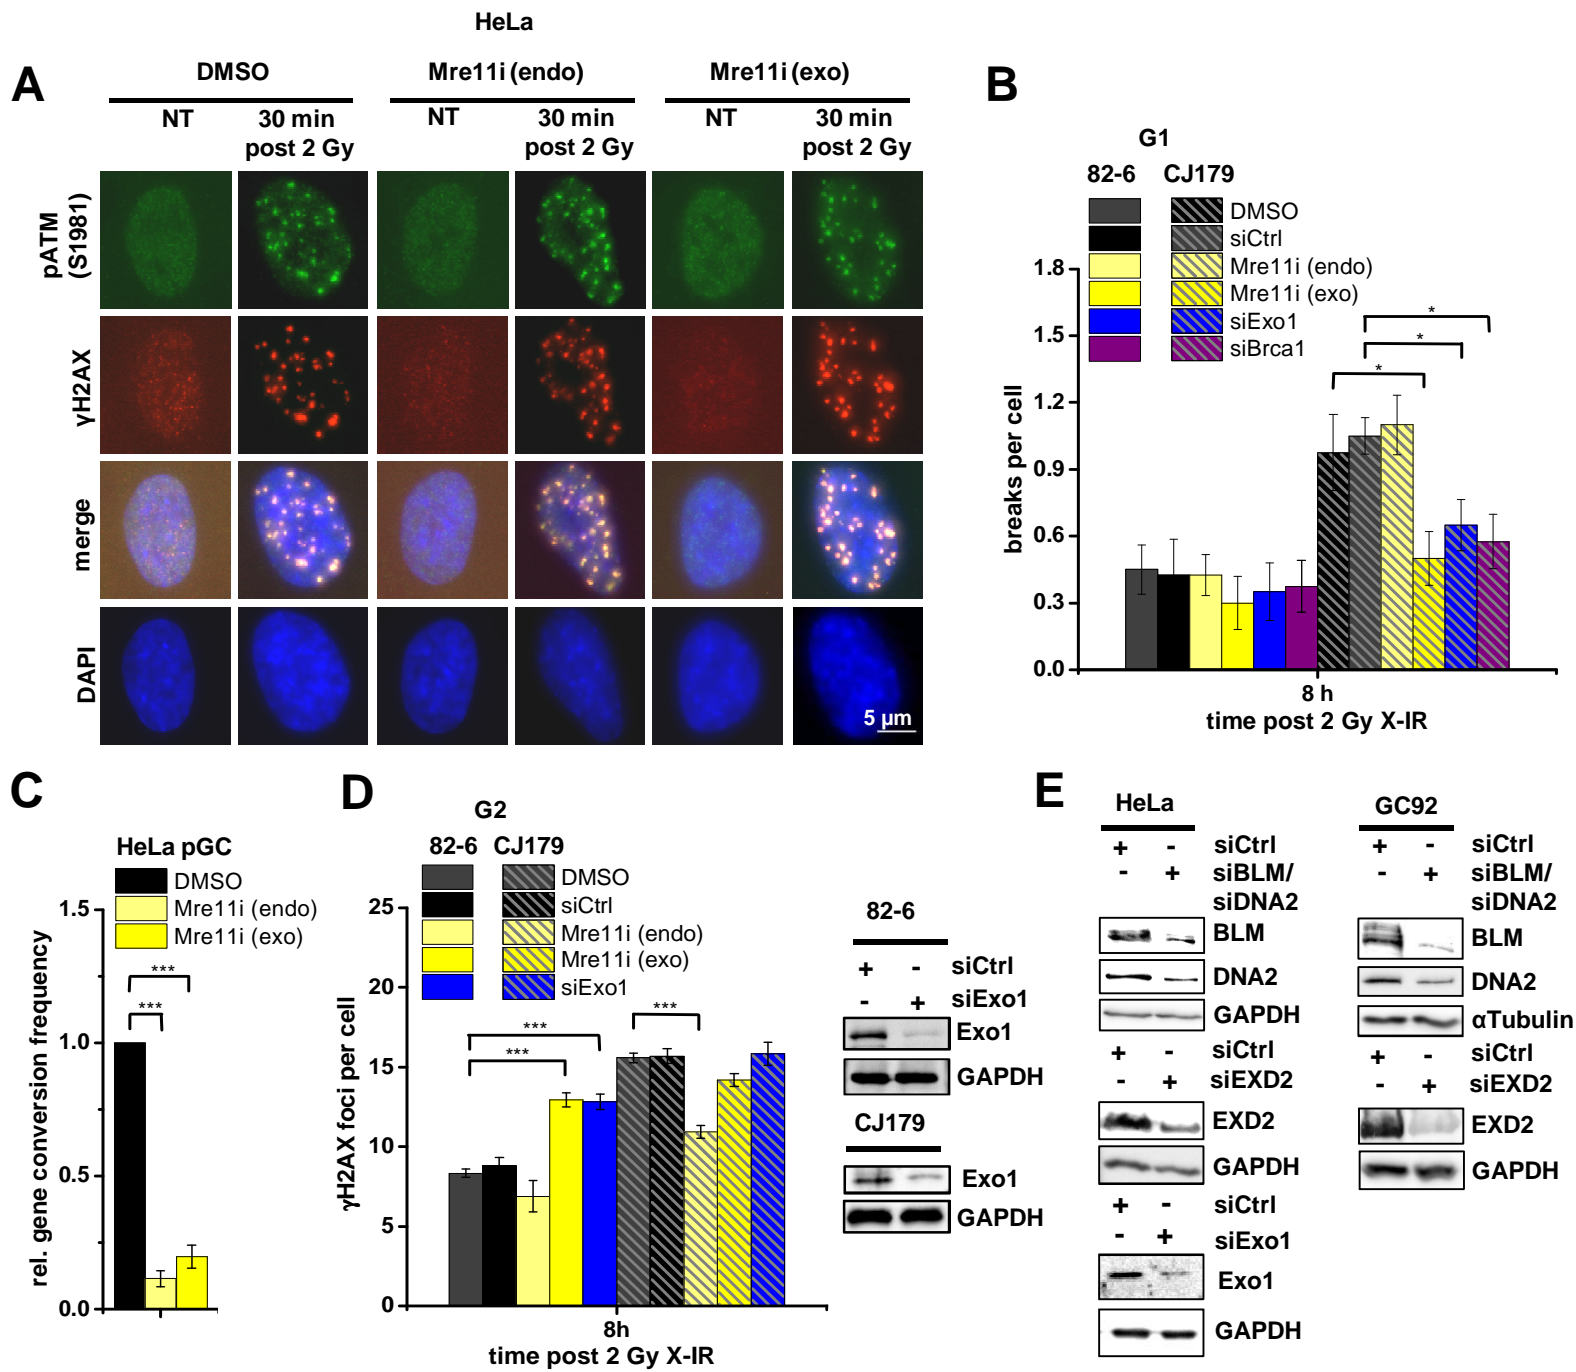

# Figure S5

## A

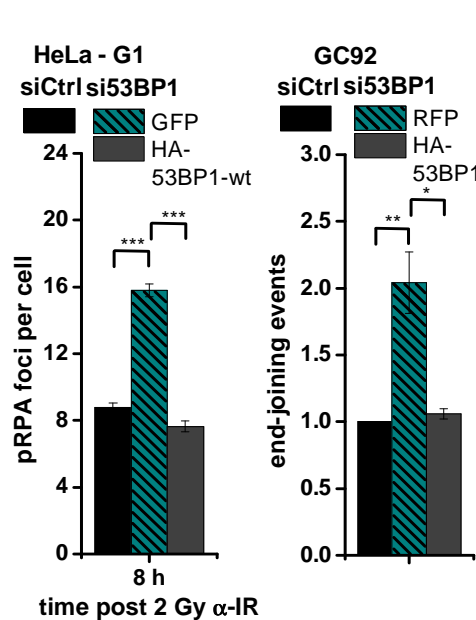

## B

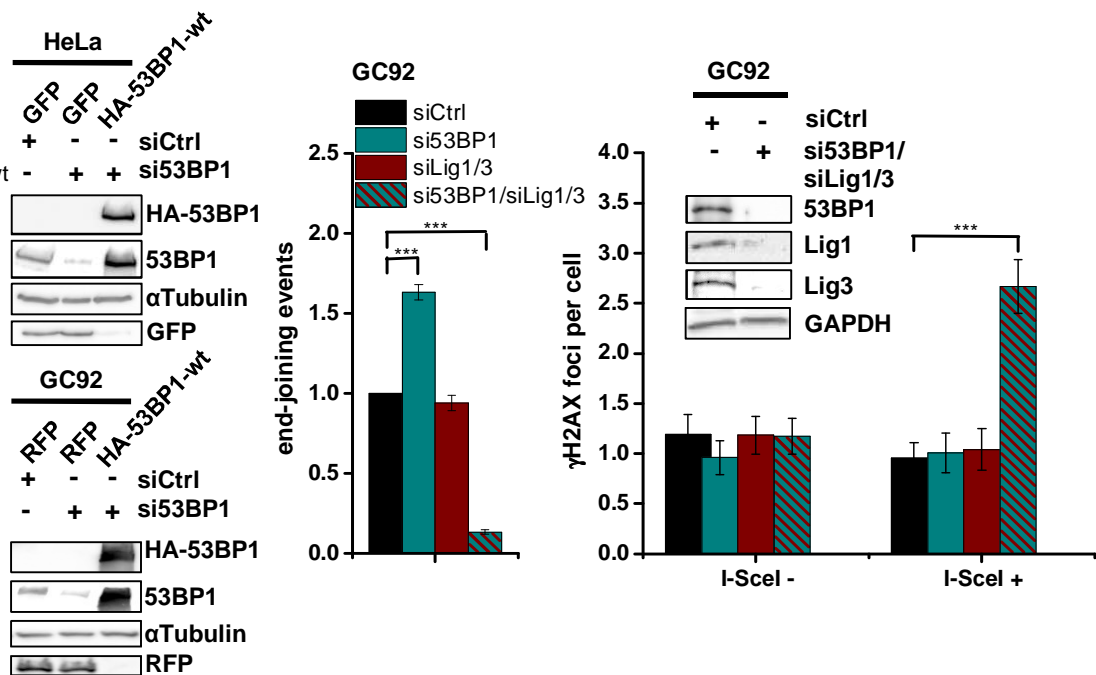

## C

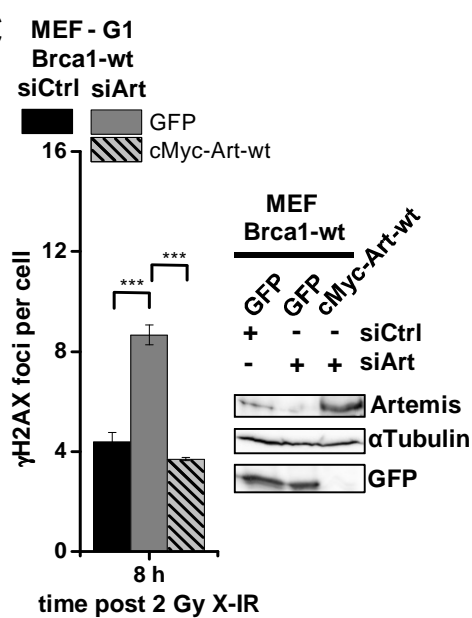

## D

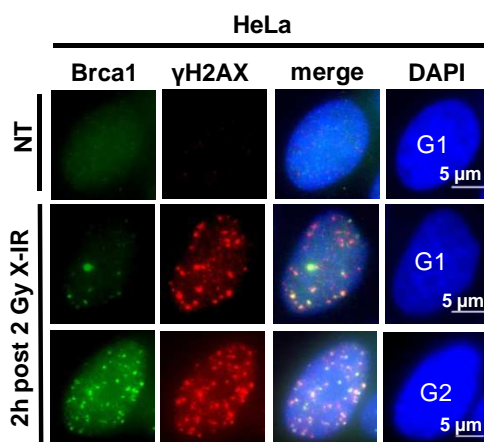

## E

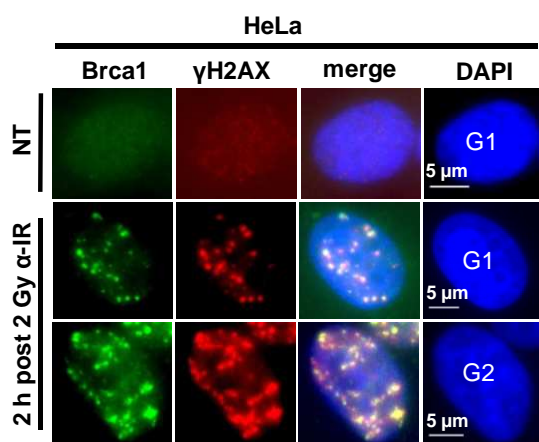

# Figure S6

## A

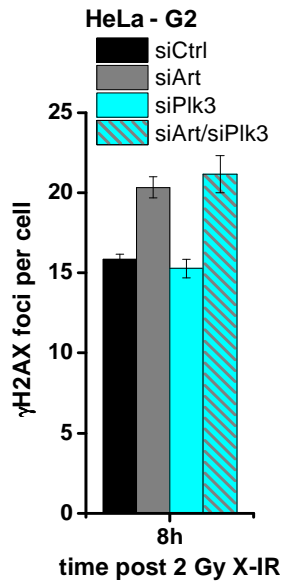

## B

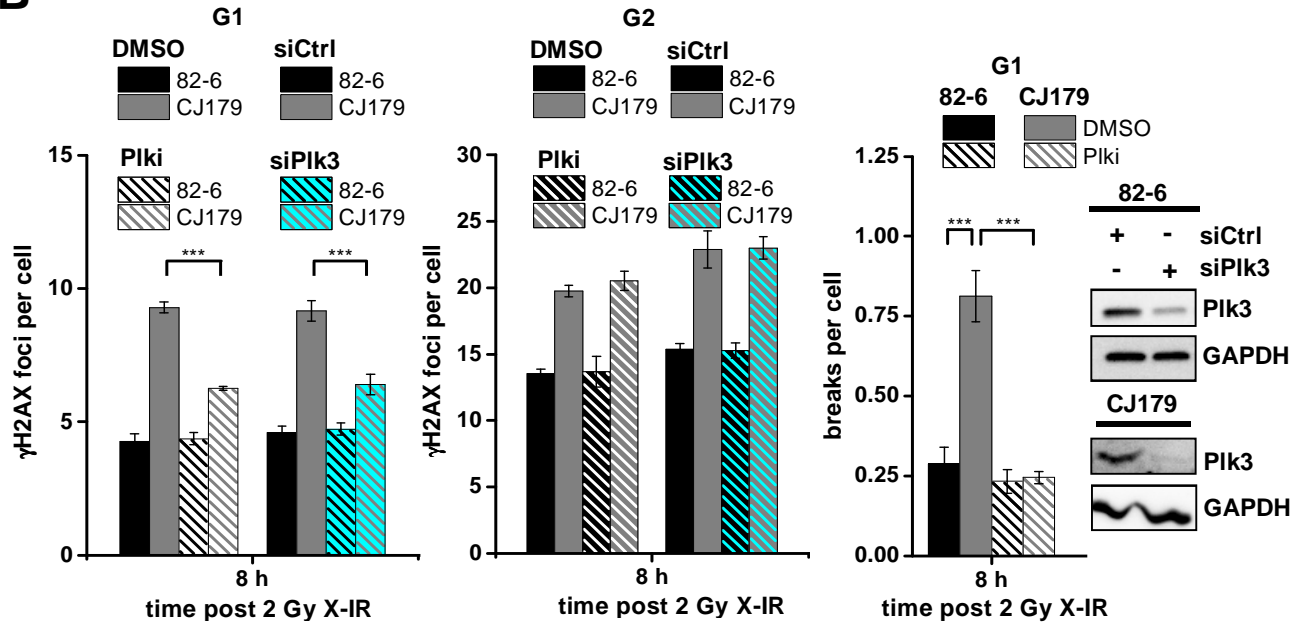

## C

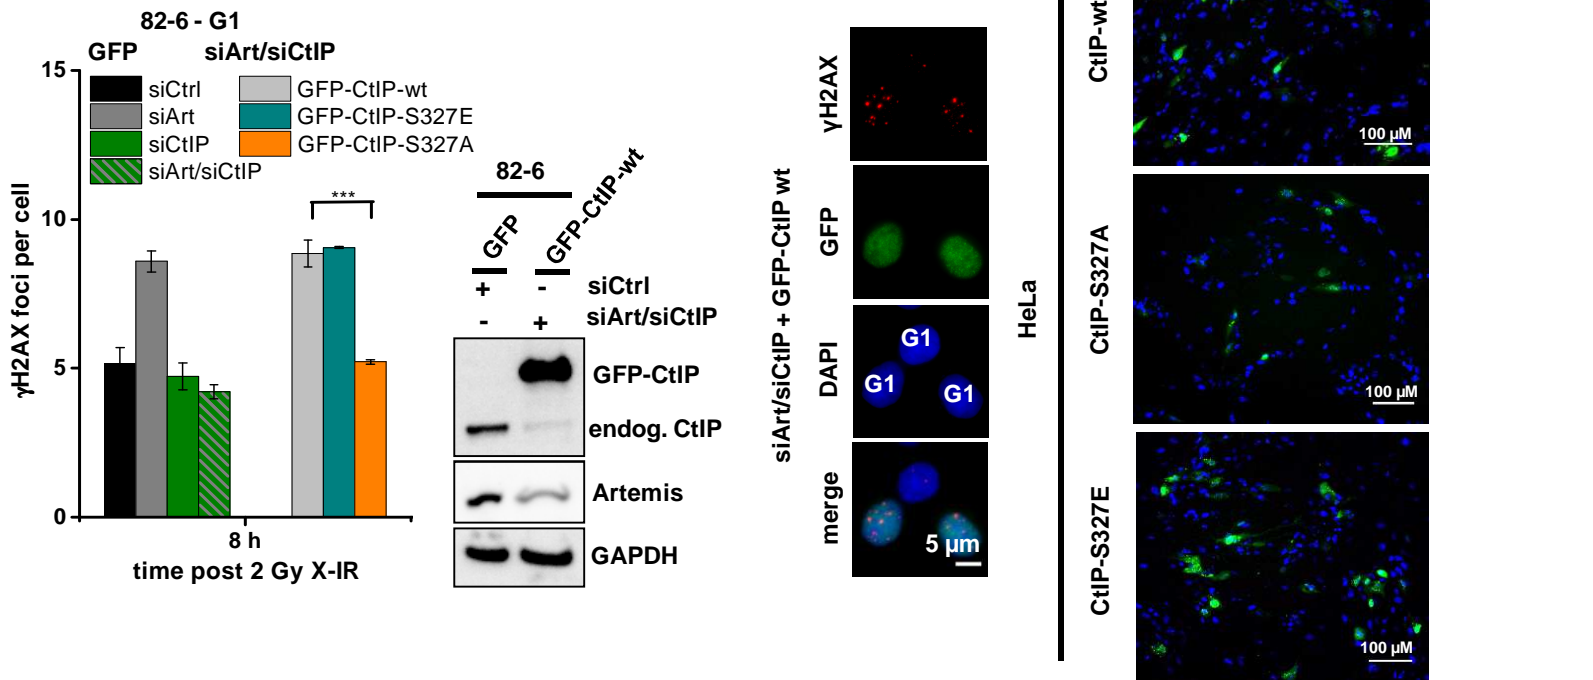

# Figure S7

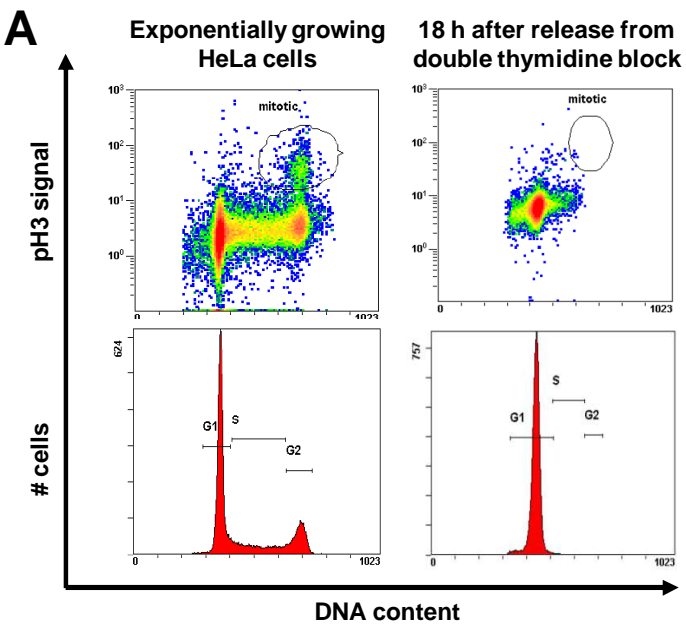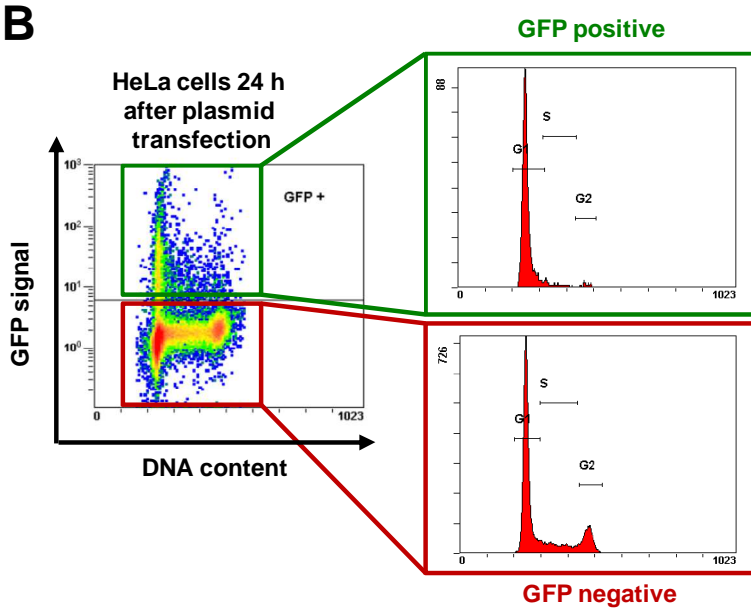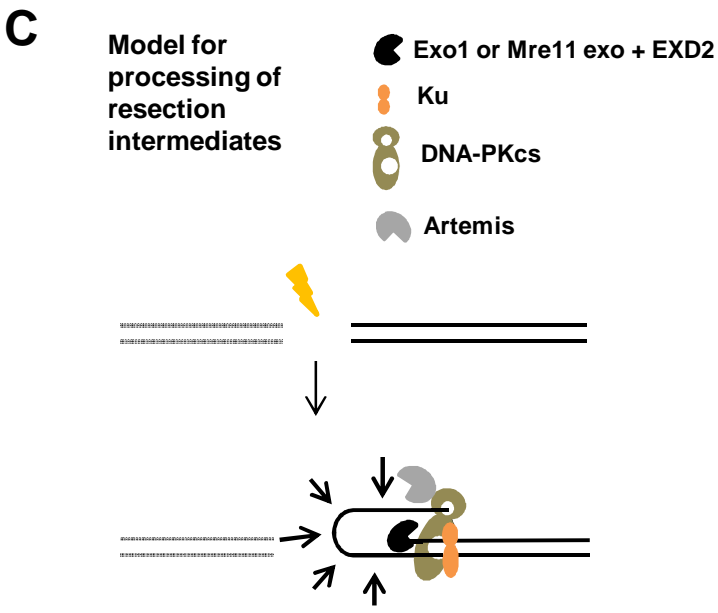



## SUPPLEMENTAL FIGURE LEGENDS

### Figure S1. Related to Figure 1

(A) Upper images: Growing 82-6 cells were incubated with BrdU in the absence of nocodazole for 1 or 14 h before analysis by flow cytometry. Growth in the presence of BrdU (and absence of nocodazole) for 14 h results in BrdU<sup>+</sup> G1 cells and depletion of the BrdU<sup>-</sup> G2 population. Lower images: 82-6 cells were treated with nocodazole, incubated with BrdU, irradiated or not, and analyzed 14 h later. Nocodazole efficiently prevented cells from progressing into G1 as evidenced by the absence of BrdU<sup>+</sup> G1 cells and the maintenance of the BrdU<sup>-</sup> G2 population. IR resulted in efficient G1 checkpoint induction as evidenced by the absence of early- and mid-S phase cells.

(B) Growing unirradiated 82-6 cells were pulse-labeled with EdU for 30 min and analyzed by PCC. Heavily damaged chromosome structures were confined to EdU<sup>+</sup> S-phase cells.

(C) Growing 82-6 cells were incubated with EdU, left unirradiated, not treated with nocodazole and analyzed by PCC 14 h later. Since cells progressed through the cell cycle uninhibited, EdU<sup>+</sup> chromosome spreads were obtained in heavily damaged S-phase cells as well as in G1 cells with a one-chromatid and in G2 cells with a two-chromatid morphology.

(D) Growing 82-6 cells were incubated with EdU, irradiated, treated with nocodazole and analyzed by PCC 14 h later. Since nocodazole prevented progression from G2 to G1, all cells with a one-chromatid morphology were negative for EdU whilst EdU<sup>+</sup> cells were frequently detected in spreads with heavily damaged chromosomes and in spreads with a two-chromatid morphology. Two-chromatid G2 and mitotic cells can be easily distinguished from one-chromatid G1 cells.

(E) Growing HeLa cells were stained for the G1 marker CDT1 (upper panel) and the CDT1 signal was plotted as a function of the DAPI signal (lower panel). Only G1 cells stain positive for CDT1.

(F) Growing 82-6 cells were analyzed by PCC and stained against CDT1. The images show a mitotic HeLa cell fused with either a one-chromatid (upper row) or a two-chromatid 82-6 cell (lower row). Only the one-chromatid but not the two-chromatid PCC spread stained positive for the G1 marker CDT1 (the same was observed for all other one-chromatid and two-chromatid PCC spreads). Note that during cell rupture, which occurs while transferring the chromosomes to the glass slides, chromatin-bound CDT1 detaches from the chromosomes but remains detectable by IF staining in the nuclear area.

### **Figure S2. Related to Figure 1**

(A) Chromosome spreads of mitotic 82-6 cells. Growing cells were incubated with nocodazole for 14 h, the mitotic cell fraction was harvested by mitotic shake-off and analyzed with or without the PCC approach. Both approaches failed to provide one-chromatid spreads while two-chromatid mitotic structures were clearly visible which typically are more condensed than the two-chromatid structures of G2 cells. This control experiment shows that mitotic 82-6 cells do not give rise to one-chromatid PCC spreads.

(B) Chromosome breaks and translocations in one-chromatid PCC spreads obtained from confluent 82-6 cells treated with DNA-PKi at 6 h post IR. The results confirm the analysis of the one-chromatid PCC spreads obtained from growing 82-6 cells in Figure 1D. Mean +/- SEM.

(C) Chromosome breaks and translocations in PCC spreads obtained from confluent 82-6 and Artemis-deficient CJ179 cells. The results confirm the analysis of the one-chromatid PCC spreads obtained from growing 82-6 and CJ179 cells in Figure 1E. Mean +/- SEM.

(D) Left panel: 82-6 cells were treated with nocodazole, incubated with BrdU, irradiated or not, and analyzed 8 h later by flow cytometry. Nocodazole efficiently prevented cells from progressing into G1 as evidenced by the absence of BrdU<sup>+</sup> G1 cells and the maintenance of the BrdU<sup>-</sup> G2 population. IR resulted in efficient G1 checkpoint induction as evidenced by the absence of early S-phase cells. Right panels: Identification of cell cycle phases using a semi-automated scanning system. Cells were incubated with nocodazole and EdU 30 min prior to IR and during the entire repair period. Cells were scanned under the microscope; EdU and GFP signals were plotted against the DAPI signal. All EdU<sup>+</sup> S-phase cells were excluded from the analysis and only EdU<sup>-</sup> G1 and G2 cells, which remained in these cell cycle phases during repair incubation, were analyzed. For complementation experiments, only GFP<sup>+</sup> EdU<sup>-</sup> G1 cells were analyzed.

(E)  $\gamma$ H2AX foci in G1 HeLa cells treated with siKu80 plus PARPi or siLig1/3. Mean +/- SEM.

### **Figure S3. Related to Figure 2**

(A) Left panel: HeLa cells were treated with nocodazole, incubated with BrdU, irradiated or not, and analyzed 8 h later by flow cytometry. Nocodazole efficiently prevented cells from progressing into G1 as evidenced by the absence of BrdU<sup>+</sup> G1 cells and the maintenance of the BrdU<sup>-</sup> G2 population. Despite the lack of an efficient G1 checkpoint, a substantial proportion of cells remained in G1 during repair incubation. Right panel:  $\gamma$ H2AX foci in G1 HeLa cells treated with siArtemis and/or siCtIP. Mean +/- SEM.

(B) BrdU foci in G1 HeLa cells treated with siArtemis. Mean +/- SEM.

(C)  $\gamma$ H2AX foci in G1 82-6 and CJ179 cells treated with siCtIP, PARP or DNA-PK inhibitors. Mean +/- SEM.

(D) pRPA foci in G1 HeLa cells treated with siArtemis, siCtIP, siExo1, siBrca1 or Mre11 exo- or endonuclease inhibitors. Mean +/- SEM.

(E) Ku and pRPA staining in G1 HeLa cells. Co-localization was analyzed by line blots and observed in >95% of pRPA foci. White circles: Co-localizing foci; red circles: non-co-localizing foci.

(F) Ku and Rad51 staining in G2 HeLa cells. Co-localization was analyzed by line blots and observed in <20% (after 20 Gy, 4 h) or <10% (after 4 Gy, 8 h) of Rad51 foci. White circles: Co-localizing foci; red circles: non-co-localizing foci.

#### **Figure S4. Related to Figure 4**

(A) pATM and  $\gamma$ H2AX foci in HeLa cells treated with Mre11 endo- or exonuclease inhibitor. NT: not treated.

(B) Chromosome breaks in G1 82-6 and CJ179 cells treated with Mre11 endo- or exonuclease inhibitor, siExo1 or siBrca1. Mean +/- SEM.

(C) Relative gene conversion frequencies in HeLa pGC cells containing an HR reporter substrate (Mansour et al., 2008) and treated with Mre11 endo- or exonuclease inhibitor. Mean +/- SEM.

(D)  $\gamma$ H2AX foci in G2 82-6 and CJ179 cells treated with Mre11 endo- or exonuclease inhibitor or siExo1. Mean +/- SEM.

(E) Knock-down efficiencies in HeLa and GC92 cells.

#### **Figure S5. Related to Figure 5**

(A) pRPA foci in G1 HeLa and end-joining events in GC92 cells treated with si53BP1. Cells were transfected with GFP, RFP or HA-53BP1-wt constructs and GFP<sup>+</sup>, RFP<sup>+</sup> or HA<sup>+</sup> cells were analyzed. Mean +/- SEM.

(B) Left panel: End-joining events in GC92 cells treated with siLig1/3 and/or si53BP1. Right panel:  $\gamma$ H2AX foci in GC92 cells treated with siLig1/3 and/or si53BP1. Cells were transfected with I-SceI and foci were scored in I-SceI<sup>+</sup> and I-SceI<sup>-</sup> cells (identified by IF against I-SceI). Mean +/- SEM.

(C)  $\gamma$ H2AX foci in G1 MEFs treated with siArtemis. Cells were transfected with GFP or cMyc-Artemis-wt constructs and foci were analyzed in GFP<sup>+</sup> or cMyc<sup>+</sup> G1 cells. Mean +/- SEM.

(D) and (E) Brca1 and  $\gamma$ H2AX foci in G1 and G2 HeLa cells after X-IR (panel D) or  $\alpha$ -IR (panel E). NT: not treated.

### **Figure S6. Related to Figure 6**

(A)  $\gamma$ H2AX foci in G2 HeLa cells treated with siArtemis and/or siPlk3. Mean +/- SEM.

(B)  $\gamma$ H2AX foci and chromosome breaks in G1 and/or G2 82-6 and CJ179 cells treated with siPlk3 or Plki. Mean +/- SEM.

(C) Left panel:  $\gamma$ H2AX foci in G1 82-6 cells treated with siArtemis and/or siCtIP. Cells were transfected with GFP, GFP-CtIP-wt, a phospho-mimic (GFP-CtIP-S327E) or a non-phosphorylatable mutant (GFP-CtIP-S327A) and foci were analyzed in GFP<sup>+</sup> G1 cells. Right panel: IF images showing similar transfection efficiencies for the various CtIP constructs. Mean +/- SEM.

### **Figure S7. Related to Figure 7**

(A) Flow cytometry analysis of HeLa cells growing exponentially or 18 h after release from a double thymidine block, showing synchronization in G1 phase.

(B) Flow cytometry analysis of HeLa cells 24 h after transfection with GFP-CtIP constructs. The cell cycle distribution shows G1 synchronisation of the GFP<sup>+</sup> cells.

(C) Speculative model for processing of resection intermediates: Ku translocates inwards and restricts the extent of resection by Exo1 or Mre11 exonuclease/ EXD2. The ssDNA tail is captured by the ssDNA channel of DNA-PKcs generating a hairpin-like structure which is cleaved by Artemis bound to DNA-PKcs (arrows indicate potential cleavage sites). In this model Artemis is required for processing of trapped resection intermediates and subsequent formation of ssDNA. pRPA foci arise when cleavage results in a ssDNA tail long enough for RPA binding (estimated to be >20 bp). DNA-PKcs may either remain loosely bound to Ku80 during the entire process or may attach to the ss/dsDNA transition at the resected end after Ku translocation but before cleavage by Artemis.

**Table S1. Sequence analysis of end-joining events after Lig1/3 depletion, related to Figure 3**

| Amount<br>n=33 | siCtrl + I-SceI                                           | Size of<br>deletion | Size of<br>insertion |
|----------------|-----------------------------------------------------------|---------------------|----------------------|
| 6x             | C A C G G A A G G A A T T A C C C T G T T A T C C C T A T | 0                   | 0                    |
| 1x             | C A C G G A A G G A A T T A C C C T G T T - - C C C T A T | 2                   | 0                    |
| 1x             | C A C G G A A G G A A T T A C C C T - - - A T C C C T A T | 3                   | 0                    |
| 1x             | C A C G G A A G G A A T T A - - - T G T T A T C C C T A T | 3                   | 4                    |
| 1x             | C A C G G A A G G A A T T A C C C T G - - - - C C C T A T | 4                   | 0                    |
| 1x             | C A C - - - - G G A A T T A C C C T G T T A T C C C T A T | 4                   | 0                    |
| 1x             | C A C G G A A G G A A T T A C C C T G T T - - - - - A T   | 6                   | 0                    |
| 2x             | C A C G G A A G G A A T T A - - - - - - - - T C C C T A T | 8                   | 0                    |
| 6x             | C A C G G A A G G A A T T A C C C T - - - - - - - - A T   | 9                   | 0                    |
| 1x             | C A C G G A A G G A A T - - - - - - - - - - - - - T A T   | 14                  | 2                    |
| 1x             | C A C G G A A G G - - - - - - - - - - - - - C C T A T     | 15                  | 6                    |
| 1x             | C A - - - - - - - - - - - - - - - - - - - C T A T         | 23                  | 7                    |
| 1x             | C G C T - [ - ] - - - - - - - - - - - - - C T A T         | 34                  | 0                    |
| 1x             | C G C T - [ - ] - - - - - - - - - - - - - C T A T         | 34                  | 3                    |
| 1x             | G C G C - [ - ] - - - - - - - - - - - - - T A T           | 36                  | 0                    |
| 1x             | C A C G - - - - - - - - - - - - - [ - ] - C C A T         | 42                  | 0                    |
| 1x             | A G A G - [ - ] - - - - - - - - - - - - - [ - ] - T C A C | 44                  | 10                   |
| 1x             | C T G G - [ - ] - - - - - - - - - - - - - [ - ] - C T A G | 46                  | 13                   |
| 1x             | A A T A - [ - ] - - - - - - - - - - - - - - - - - T       | 73                  | 0                    |
| 1x             | C A C G - - - - - - - - - - - - - - - [ - ] - A G C T     | 109                 | 0                    |
| 1x             | C A C G G A - - - - - - - - - - - - - - - [ - ] - G C T G | 266                 | 2                    |
| 1x             | C T T G - [ - ] - - - - - - - - - - - - - [ - ] - C G G T | 517                 | 0                    |

| Amount<br>n=25 | siLig1/3 + I-SceI                                         | Size of<br>deletion | Size of<br>insertion |
|----------------|-----------------------------------------------------------|---------------------|----------------------|
| 5x             | C A C G G A A G G A A T T A C C C T G T T A T C C C T A T | 0                   | 0                    |
| 1x             | C A C G G A A G G A A T T A C C C T - T T A T C C C T A T | 1                   | 0                    |
| 1x             | C A C G G A A G G A A T T A C C C T - T T A T C C C T A T | 1                   | 13                   |
| 1x             | C A C G G A A G G A A T T A C C C T - - - A T C C C T A T | 3                   | 0                    |
| 2x             | C A C G G A A G G A A T T A - - - - - - - - T C C C T A T | 8                   | 0                    |
| 1x             | C A C G G A A G G A A T T - - - - - - - - A T C C C T A T | 8                   | 0                    |
| 1x             | C A C G G A A G G A A T - - - - - - - - A T C C C T A T   | 9                   | 0                    |
| 1x             | C A C G G A A G G A A T T A C C C T G T - [ - ] - C T A G | 9                   | 0                    |
| 2x             | C A C G G A A G G A A T T A C C C T - - - - - - - - A T   | 9                   | 0                    |
| 1x             | C A C G G A A G G A A - - - - - - - - - - T C C C T A T   | 11                  | 0                    |
| 1x             | C A C G G A A G G A A T T A C C - - - - - - - - C T A T   | 13                  | 3                    |
| 1x             | C A C G G A A G G A - - - - - - - - - - [ - ] - T A T G   | 24                  | 0                    |

|     |                                                          |     |   |
|-----|----------------------------------------------------------|-----|---|
| 1 x | C A C G G <b>A A</b> - - - - - [ - ] - T C A C           | 34  | 0 |
| 1 x | <b>T A G A</b> - [ - ] - - - - - [ - ] - T A T G         | 38  | 0 |
| 1 x | G <b>C T A</b> - [ - ] - - - - - - - - - - - T           | 42  | 0 |
| 1 x | T G <b>G C</b> - [ - ] - - - - - - - - - [ - ] - C A T G | 63  | 0 |
| 1 x | C C A <b>T</b> - [ - ] - - - - - - - - - - - - - A T     | 174 | 0 |
| 1 x | <b>C A</b> - - - - - - - - - - - - - [ - ] - G C T G     | 281 | 0 |
| 1 x | C A C G G A A G <b>G A A</b> - - - - - [ - ] - C T G C   | 342 | 0 |

Sequence analysis of GC92 wt and siLig1/3-treated cells. The 18 nucleotide long I-SceI recognition sequence is in **bold**, the characteristic I-SceI cutting site is labeled **yellow**, and microhomologies are labeled **red**. All sequences are arranged according to their siRNA treatment and to the size of their deletion. Some sequences contained inserted nucleotides in their deleted region.

### List of Insertions

#### siCtrl

D=3; I=4 : TTCA

D=14; I=2 : CA

D=15; I=6 : GTAATT

D=23; I=7 : AGCTGTT

D=34; I=3 : TGG

D=44; I=10 : CACAACACGG

D=46; I=13 : GTAAGCTTACAAG

D=266; I=2 : CA

#### siLig1/3

D=1; I=13 : AGCTAGATATGAA

D=13; I=3 : TAT

**Table S2. List of sequence-based reagents used in this study, related to Star Methods**

| Sequence-Based Reagents                                                          |            |          |
|----------------------------------------------------------------------------------|------------|----------|
| siRNA targeting sequence: human 53BP1:<br>AGA ACG AGG AGA CGG UAA UAG UGG G      | Qiagen     | N/A      |
| siRNA targeting sequence: human 53BP1:<br>GAG AGC AGA TGA TCC TTT A              | Dharmacon  | N/A      |
| siRNA targeting sequence: human Artemis:<br>AAC TGA AGA GAG CTA GAA CAG          | Qiagen     | N/A      |
| siRNA targeting sequence: mouse Artemis:<br>AAG GAT CAC ATG AAA GGA TTA          | Qiagen     | N/A      |
| siRNA targeting sequence: human BLM:<br>AAG CTA GGA GTC TGC GTG CGA              | Qiagen     | N/A      |
| siRNA targeting sequence: human Brca1:<br>AAT CAC AGT GTC CTT TAT GTA            | Qiagen     | N/A      |
| siRNA targeting sequence: human CtIP1:<br>TCC ACA ACA TAA TCC TAA TAA            | Qiagen     | N/A      |
| siRNA targeting sequence: human CtIP2:<br>AAG CTA AAA CAG GAA CGA ATC            | Qiagen     | N/A      |
| siRNA targeting sequence: human DNA2:<br>AAA TAG CCA GTA GTA TTC GAT             | Qiagen     | N/A      |
| siRNA targeting sequence: human DNA-PKcs:<br>CTC GTG TAT TAC AGA AGG AAA         | Qiagen     | N/A      |
| siRNA targeting sequence: human EXD2: smart pool                                 | Dharmacon  | N/A      |
| siRNA targeting sequence: human Exo1:<br>CAA GCC TAT TCT CGT ATT TTT             | Qiagen     | N/A      |
| siRNA targeting sequence: human Ku70:<br>GGA AGA GAT AGT TTG ATT TTT             | Qiagen     | N/A      |
| siRNA targeting sequence: human Ku80:<br>AAG ACA GAC ACC CTT GAA GAC             | Qiagen     | N/A      |
| siRNA targeting sequence: human Lig1:<br>GGC ATG ATC CTG AAG CAG A               | Qiagen     | N/A      |
| siRNA targeting sequence: human Lig3:<br>CCA CAA AAA AAA TCG AGG A               | Qiagen     | N/A      |
| siRNA targeting sequence: human Lig4:<br>CAA GAT GTT TAC AGA AAG GAA             | Qiagen     | N/A      |
| siRNA targeting sequence: human Plk3:<br>CTG CAT CAA GCA GGT TCA CTA             | Qiagen     | N/A      |
| siRNA targeting sequence: control:<br>AAT TCT CCG AAC GTG TCA CGT                | Qiagen     | N/A      |
| Artemis gRNA sequence:<br>GAG ACT TCA GAT TGG CGC A<br>GAG CCC GTA CCA TGT TGT G | This paper | N/A      |
| PCR primer sequence: CMV2:<br>ATA TAT GGA GTT CCG CGT TAC AT                     | This paper | Eurofins |
| PCR primer sequence: CD4int:<br>GCT GCC CCA GAA TCT TCC TCT                      | This paper | Eurofins |

SiRNA targeting sequences used for protein downregulation, gRNA sequences used for generation of CRISPR/Cas9 knockout and PCR primer sequences used for sequence analysis.
